# Supplementary material for: Exploring data quality and use of the routine health information system in Ethiopia: a mixed-methods study
Source: PubMed Central journal article supplement (PMC8710857; doi:10.1136/bmjopen-2021-050356), 2021-12-23
Supplement: bmjopen-2021-050356supp002.pdf [file bmjopen-2021-050356supp002.pdf]

**Data collection tool for malaria indicators**  
**Structured questionnaire for health facility**

| <b>CONFIRMED AND SUSPECTED MALARIA CASES</b>                                                          |                                                                                                                                             |                                                                                                                                                                                                                                                       |                                        |
|-------------------------------------------------------------------------------------------------------|---------------------------------------------------------------------------------------------------------------------------------------------|-------------------------------------------------------------------------------------------------------------------------------------------------------------------------------------------------------------------------------------------------------|----------------------------------------|
| 1                                                                                                     | Does this facility diagnose and treat malaria?                                                                                              | 1. Yes <input type="checkbox"/>                                                                                                                                                                                                                       | 0. No <input type="checkbox"/>         |
| <b>SOURCE DOCUMENTS AND REPORTS</b>                                                                   |                                                                                                                                             |                                                                                                                                                                                                                                                       |                                        |
| 2                                                                                                     | Does this facility report malaria data to a reporting system?                                                                               | 1. Yes <input type="checkbox"/>                                                                                                                                                                                                                       | 0. No <input type="checkbox"/>         |
| 3                                                                                                     | To which of the following reporting systems does the facility report malaria data?                                                          | 1. Health Management Information System (HMIS)<br>2. Public health Emergency Management (PHEM)<br>3. Malaria program<br>4. Nongovernmental organizations or institutions<br>5. Other reporting system (Specify)                                       |                                        |
| 4                                                                                                     | What is the source document used by this facility for monthly/weekly reporting of malaria?                                                  | 1. Laboratory register<br>2. OPD register<br>3. Inpatient register<br>4. Emergency register<br>5. Other (specify)                                                                                                                                     |                                        |
| <b>REPORT TIMELINESS</b>                                                                              |                                                                                                                                             |                                                                                                                                                                                                                                                       |                                        |
| 5                                                                                                     | Is there a deadline for submission of the malaria report by the health facilities?                                                          | 1. <u>Yes</u><br>2. <u>No</u>                                                                                                                                                                                                                         |                                        |
| 6                                                                                                     | If yes, what is the deadline (date of month)?<br>(Write the end date of the deadline)                                                       | Reporting deadline: _____                                                                                                                                                                                                                             |                                        |
| 7                                                                                                     | Does the health facility record the dates of submission of monthly/weekly malaria reports to the Woreda/Zone/Region (see logbook/computer)? | 1. <u>Yes</u><br>2. <u>No</u>                                                                                                                                                                                                                         |                                        |
| <b>IF AVAILABLE, REVIEW THE RECORDS AND CHECK THE DATES OF SUBMISSION FOR THE THREE REVIEW MONTHS</b> |                                                                                                                                             |                                                                                                                                                                                                                                                       |                                        |
| 8                                                                                                     | Month 1                                                                                                                                     | Reported date _____                                                                                                                                                                                                                                   |                                        |
|                                                                                                       | Month 2                                                                                                                                     | Reported date _____                                                                                                                                                                                                                                   |                                        |
|                                                                                                       | Month 3                                                                                                                                     | Reported date _____                                                                                                                                                                                                                                   |                                        |
| 9                                                                                                     | If any discrepancy is observed between Reporting deadline and each reporting date, what are the possible reason?                            | 1. <u>Shortage of man power</u><br>2. <u>Interruption of electricity/computer</u><br>3. <u>Shortage of reporting formats</u><br>4. <u>Competing priority (Campaign)</u><br>5. <u>Reporting date aligned with holiday</u><br>6. <u>Other (Specify)</u> | If there is no discrepancy skip to Q10 |
| 10                                                                                                    | What method of reporting system does the facility use                                                                                       | 1. <u>Paper based system</u><br>2. <u>Electronic system</u>                                                                                                                                                                                           |                                        |

|                                                                                  |                                                                                                                                                                                                                                            |                                                                                                                                                                                                     |                                                                                                            |
|----------------------------------------------------------------------------------|--------------------------------------------------------------------------------------------------------------------------------------------------------------------------------------------------------------------------------------------|-----------------------------------------------------------------------------------------------------------------------------------------------------------------------------------------------------|------------------------------------------------------------------------------------------------------------|
|                                                                                  |                                                                                                                                                                                                                                            | 3. Both                                                                                                                                                                                             |                                                                                                            |
| <b>DATA USE FOR DECISION MAKING</b>                                              |                                                                                                                                                                                                                                            |                                                                                                                                                                                                     |                                                                                                            |
| <b>11</b>                                                                        | Does the health facility have analysed malaria data (e.g., summary tables, charts, maps)?                                                                                                                                                  | 0. No<br>1. Yes, observed paper-based<br>2. Yes, observed electronic<br>3. Both                                                                                                                     |                                                                                                            |
| <b>12</b>                                                                        | Does the health facility uses analysed malaria data for decision making                                                                                                                                                                    | 1. Yes<br>2. No                                                                                                                                                                                     | If no<br>Skip to<br>Q14                                                                                    |
| <b>13</b>                                                                        | If Yes, for what purpose                                                                                                                                                                                                                   | 1. Performance management (Planning and reporting)<br>2. Supply requesting and reporting<br>3. Priority setting<br>4. Monitoring targets<br>5. Advocacy<br>6. Other (Specify)                       | Skip to<br>Q16                                                                                             |
| <b>14</b>                                                                        | If no, what are the possible bases for decision making in your health facility                                                                                                                                                             | 1. Personal preference for decision making<br>2. Superior directives<br>3. What was done in last year<br>4. Funding directives from higher level.<br>5. Political considerations<br>Other (Specify) |                                                                                                            |
| <b>15</b>                                                                        | If No, what are the possible reasons for not using malaria data for decision making in your health facility                                                                                                                                | 1. Poor data quality<br>2. Unavailability of data<br>3. Negative Perception<br>4. Other (Specify)                                                                                                   |                                                                                                            |
| <b>REVIEW THE SOURCE DOCUMENTS AND MONTHLY REPORT FOR SUSPECTED MALARIA CASE</b> |                                                                                                                                                                                                                                            |                                                                                                                                                                                                     |                                                                                                            |
| <b>1</b>                                                                         | Please confirm the availability of <b>source documents</b> for malaria for month 1 to month 3. If available, please <b>Recount</b> the number of <b>Suspected malaria cases</b> recorded in the <b>source document</b> month 1 to month 3. | <b>(A) Source documents available</b>                                                                                                                                                               | <b>(B) Recount the number of Suspected malaria cases in the source documents (if none, please enter 0)</b> |
|                                                                                  |                                                                                                                                                                                                                                            |                                                                                                                                                                                                     | <b>(C) Record monthly Suspected malaria cases from monthly report</b>                                      |

|                                                                                  | Months                                                                                                                                                                                                                          | Yes, available and complete*          | Yes, available but partly** complete | Yes, available but no data recorded | No                                                                                                     |                                                                       |  |
|----------------------------------------------------------------------------------|---------------------------------------------------------------------------------------------------------------------------------------------------------------------------------------------------------------------------------|---------------------------------------|--------------------------------------|-------------------------------------|--------------------------------------------------------------------------------------------------------|-----------------------------------------------------------------------|--|
| <b>01</b>                                                                        | <b>Month 1</b>                                                                                                                                                                                                                  | 1                                     | 2                                    | 3                                   | 0                                                                                                      |                                                                       |  |
| <b>02</b>                                                                        | <b>Month 2</b>                                                                                                                                                                                                                  | 1                                     | 2                                    | 3                                   | 0                                                                                                      |                                                                       |  |
| <b>03</b>                                                                        | <b>Month 3</b>                                                                                                                                                                                                                  | 1                                     | 2                                    | 3                                   | 0                                                                                                      |                                                                       |  |
| <b>REVIEW THE SOURCE DOCUMENTS AND MONTHLY REPORT FOR CONFIRMED MALARIA CASE</b> |                                                                                                                                                                                                                                 |                                       |                                      |                                     |                                                                                                        |                                                                       |  |
| <b>2</b>                                                                         | Please confirm the availability of <b>source documents</b> for malaria for month 1 to month 3. If available, please <b>Recount</b> the number of conf. malaria cases recorded in the <b>source document</b> month 1 to month 3. | <b>(A) Source documents available</b> |                                      |                                     | <b>(B) Recount the number of conf. malaria cases in the source documents (if none, please enter 0)</b> | <b>(C) Record monthly confirmed malaria cases from monthly report</b> |  |
|                                                                                  | Months                                                                                                                                                                                                                          | Yes, available and complete*          | Yes, available but partly** complete | Yes, available but no data recorded | No                                                                                                     |                                                                       |  |
|                                                                                  | <b>Month 1</b>                                                                                                                                                                                                                  | 1                                     | 2                                    | 3                                   | 0                                                                                                      |                                                                       |  |
|                                                                                  | <b>Month 2</b>                                                                                                                                                                                                                  | 1                                     | 2                                    | 3                                   | 0                                                                                                      |                                                                       |  |
|                                                                                  | <b>Month 3</b>                                                                                                                                                                                                                  | 1                                     |                                      |                                     | 0                                                                                                      |                                                                       |  |
| <b>REVIEW THE SOURCE DOCUMENTS AND MONTHLY REPORT FOR TOTAL MALARIA CASE</b>     |                                                                                                                                                                                                                                 |                                       |                                      |                                     |                                                                                                        |                                                                       |  |
| <b>1</b>                                                                         | Please confirm the availability of <b>source documents</b> for malaria for month 1 to month 3. If available, please <b>Recount</b> the number of <b>total malaria</b>                                                           | <b>(A) Source documents available</b> |                                      |                                     | <b>(B) Recount the number of total malaria cases in the source documents (if none, please enter 0)</b> | <b>(C) Record monthly total malaria cases from monthly report</b>     |  |

|                                                                                                                                                                                                                                                                                                                                                                                    | <b>cases recorded in the source document month 1 to month 3.</b>                                                                   |                                                                                                                                                                                                                                                                                                                                                                           |                                    |                                            |           |  |
|------------------------------------------------------------------------------------------------------------------------------------------------------------------------------------------------------------------------------------------------------------------------------------------------------------------------------------------------------------------------------------|------------------------------------------------------------------------------------------------------------------------------------|---------------------------------------------------------------------------------------------------------------------------------------------------------------------------------------------------------------------------------------------------------------------------------------------------------------------------------------------------------------------------|------------------------------------|--------------------------------------------|-----------|--|
|                                                                                                                                                                                                                                                                                                                                                                                    | <b>Months</b>                                                                                                                      | <b>Yes, available and complete*</b>                                                                                                                                                                                                                                                                                                                                       | <b>Yes, available but partly**</b> | <b>Yes, available but no data recorded</b> | <b>No</b> |  |
|                                                                                                                                                                                                                                                                                                                                                                                    | <b>Month 1</b>                                                                                                                     | 1                                                                                                                                                                                                                                                                                                                                                                         | 2                                  | 3                                          | 0         |  |
|                                                                                                                                                                                                                                                                                                                                                                                    | <b>Month 2</b>                                                                                                                     | 1                                                                                                                                                                                                                                                                                                                                                                         | 2                                  | 3                                          | 0         |  |
|                                                                                                                                                                                                                                                                                                                                                                                    | <b>Month 3</b>                                                                                                                     | 1                                                                                                                                                                                                                                                                                                                                                                         | 2                                  |                                            | 0         |  |
| <p><b>Take the last 15 entries recorded in the Lab register for each reporting period and check if all the data elements relevant to the selected indicator are filled in.</b></p> <p><b>*COMPLETE means that the source document contains the data relevant to the selected indicator.</b></p> <p><b>**PARTLY: the register is available but some information is missing.</b></p> |                                                                                                                                    |                                                                                                                                                                                                                                                                                                                                                                           |                                    |                                            |           |  |
| 2                                                                                                                                                                                                                                                                                                                                                                                  | If the source document (Lab register) is not available, what are the possible reasons?                                             | <ol style="list-style-type: none"> <li>1. Storage or archiving problems</li> <li>2. Absence of designated staff</li> <li>3. Stock out of source document</li> <li>4. Other (specify):<br/>—</li> </ol>                                                                                                                                                                    |                                    |                                            |           |  |
| 3                                                                                                                                                                                                                                                                                                                                                                                  | If the source documents (Lab register/) are partially complete or has no data, what are the possible reasons for the missing data? | <ol style="list-style-type: none"> <li>1. Staffing issue(s)(shortage, absence )</li> <li>2. Not understanding the data element</li> <li>3. Presence of other vertical reporting requirement</li> <li>4. Data burden (too much data elements to be recorded)</li> <li>5. The recording tool is not designed as user friendly</li> <li>6. Other (specify):<br/>—</li> </ol> |                                    |                                            |           |  |
| <b>DATA COMPLETENESS</b>                                                                                                                                                                                                                                                                                                                                                           |                                                                                                                                    |                                                                                                                                                                                                                                                                                                                                                                           |                                    |                                            |           |  |

|                      |                                                                                                                                                  |                                                                                                                                                                                                                                                                                                                                                                                                                        |
|----------------------|--------------------------------------------------------------------------------------------------------------------------------------------------|------------------------------------------------------------------------------------------------------------------------------------------------------------------------------------------------------------------------------------------------------------------------------------------------------------------------------------------------------------------------------------------------------------------------|
| 5                    | If the monthly report for malaria is not available, what are the possible reasons?                                                               | <ol style="list-style-type: none"> <li>1. Storage or archiving problems</li> <li>2. Absence of designated staff</li> <li>3. Stock out of source document</li> <li>4. Other (specify): _____</li> </ol>                                                                                                                                                                                                                 |
| 6                    | If the monthly report of malaria is partially complete or has no data, what are the possible reasons for the missing data?                       | <ol style="list-style-type: none"> <li>1. Staffing issue(s)(shortage, absence)</li> <li>2. Not understanding the data element</li> <li>3. Presence of other vertical reporting requirement</li> <li>4. Data burden (too much data elements to be recorded)</li> <li>5. The recording tool is not designed as user friendly</li> <li>6. There is no client to be reported</li> <li>7. Other (specify): _____</li> </ol> |
| <b>DISCREPANCIES</b> |                                                                                                                                                  |                                                                                                                                                                                                                                                                                                                                                                                                                        |
| 7                    | If there was a discrepancy observed between the <b>source document</b> and the <b>monthly report</b> , what are the reasons for the discrepancy? | <ol style="list-style-type: none"> <li>1. Data entry errors</li> <li>2. Arithmetic errors</li> <li>3. Information from all source documents not compiled correctly</li> <li>4. Data burden (too much data elements to be reported)</li> <li>5. Illegible writing on the source document (not readable)</li> <li>6. Lack of emphasis for data accuracy</li> <li>7. Other (specify) _____</li> </ol>                     |
| 8                    | If there was a discrepancy observed between the <b>source document</b> and the <b>monthly report</b> , what are the reasons for the discrepancy? | <ol style="list-style-type: none"> <li>1. Data entry errors</li> <li>2. Arithmetic errors</li> <li>3. Information from all source documents not compiled correctly</li> <li>4. Data burden (too much data elements to be reported)</li> <li>5. Illegible writing on the source document (not readable)</li> <li>6. Lack of emphasis for data accuracy</li> <li>7. Other (specify) _____</li> </ol>                     |
