# Supplementary material for: Exploring data quality and use of the routine health information system in Ethiopia: a mixed-methods study
Source: PubMed Central journal article supplement (PMC8710857; doi:10.1136/bmjopen-2021-050356), 2021-12-23
Supplement: bmjopen-2021-050356supp003.pdf [file bmjopen-2021-050356supp003.pdf]

## Data collection tool for Maternal Health Indicators

Checklists for collecting data on quality at woreda and health facility level, adapted from USAID RDQA Measure Evaluation

This questionnaire will be used to collect data from the health facilities and woreda health offices in order to assess the data quality and data management system.

Facility Identification

Interviewer Name: \_\_\_\_\_

| Full reference of report (name, year, publisher etc.) |                                           |                   |                            |
|-------------------------------------------------------|-------------------------------------------|-------------------|----------------------------|
| Type of Document                                      |                                           |                   |                            |
| Study Design                                          |                                           |                   |                            |
| Study area/s                                          |                                           |                   |                            |
| Study period                                          |                                           |                   |                            |
| Study population                                      |                                           |                   |                            |
| Sample size                                           |                                           |                   |                            |
| Indicators                                            | Definition<br>(Numerator<br>/Denominator) | Reported Coverage |                            |
|                                                       |                                           | National          | Benishangul Gumz<br>Region |
| Antenatal care visits at least one (ANC1)             |                                           |                   |                            |
| Antenatal care 4th visit (ANC4)                       |                                           |                   |                            |
| Skilled delivery attendance                           |                                           |                   |                            |
| Postnatal Care                                        |                                           |                   |                            |
| Comments                                              |                                           |                   |                            |

| Number                  | Question                  | Result               |                    |
|-------------------------|---------------------------|----------------------|--------------------|
| SECTION 1: COVER PAGE   |                           |                      |                    |
| Date                    | DAY _____<br>Day          | MONTH _____<br>Month | YEAR _____<br>Year |
| FACILITY IDENTIFICATION |                           |                      |                    |
| Q001                    | Region Name               |                      |                    |
| Q002                    | Zone/sub-city name        |                      |                    |
| Q003                    | Facility ID               |                      |                    |
| Q004                    | Official name of facility |                      |                    |

| Number | Question         | Result                       |
|--------|------------------|------------------------------|
| Q005   | Woreda Name      |                              |
| Q006   | Town Name        |                              |
| Q007   | Kebele Name      |                              |
| Q008   | Type of facility | HEALTH CENTRE<br>HEALTH POST |
| Q009   | Urban/Rural      | URBAN<br>RURAL               |

### 1. Service Delivery Sites (health facilities)

| Demographic data                                                                                                                                                                                                                                                                                        |                                                                                                                                                           |                             |                       |     |      |
|---------------------------------------------------------------------------------------------------------------------------------------------------------------------------------------------------------------------------------------------------------------------------------------------------------|-----------------------------------------------------------------------------------------------------------------------------------------------------------|-----------------------------|-----------------------|-----|------|
|                                                                                                                                                                                                                                                                                                         | Information                                                                                                                                               | Response Yes=1,No=2         | Remark                |     |      |
| 1                                                                                                                                                                                                                                                                                                       | Does the facility have the catchment population the calendar year?                                                                                        |                             | If 'yes' how much ... |     |      |
| 2                                                                                                                                                                                                                                                                                                       | Does the health center know the total number of eligible mothers for maternal service to be provided in the calendar year?                                |                             |                       |     |      |
| 3                                                                                                                                                                                                                                                                                                       | Is the denominator value (for ANC, delivery and PNC) found in the health center level the same as the one found in the national level                     |                             |                       |     |      |
| A - Documentation Review:                                                                                                                                                                                                                                                                               |                                                                                                                                                           |                             |                       |     |      |
| Review availability and completeness of all indicator source documents for the selected reporting period ( <i>if all necessary documents/facility reports are available 1=Yes, if all the necessary documents/facility reports are not available, 2= No otherwise the answer will be 3=Yes partly</i> ) |                                                                                                                                                           | ANC1                        | ANC4                  | SBA | EPNC |
| SDS_1A                                                                                                                                                                                                                                                                                                  | Review available data sources for the reporting period being verified. Are all necessary data sources (registers tally and reports) available for review? |                             |                       |     |      |
|                                                                                                                                                                                                                                                                                                         | Tikmit 2010/Octo 2017                                                                                                                                     | Tally                       |                       |     |      |
|                                                                                                                                                                                                                                                                                                         |                                                                                                                                                           | Register                    |                       |     |      |
|                                                                                                                                                                                                                                                                                                         |                                                                                                                                                           | Report from the lower level |                       |     |      |
|                                                                                                                                                                                                                                                                                                         | Hidar 2010/Nov 2017                                                                                                                                       | Tally                       |                       |     |      |
|                                                                                                                                                                                                                                                                                                         |                                                                                                                                                           | Register                    |                       |     |      |
|                                                                                                                                                                                                                                                                                                         |                                                                                                                                                           | Report from the lower level |                       |     |      |
|                                                                                                                                                                                                                                                                                                         | Tahisas 2010/ Dec 2017                                                                                                                                    | Tally                       |                       |     |      |
|                                                                                                                                                                                                                                                                                                         |                                                                                                                                                           | Register                    |                       |     |      |
| Report from the lower level                                                                                                                                                                                                                                                                             |                                                                                                                                                           |                             |                       |     |      |
| SDS_2A                                                                                                                                                                                                                                                                                                  | Are all available data sources complete? (Register and/or tally sheet for 2 <sup>nd</sup> quarter of 2010 E.C)                                            |                             |                       |     |      |

|                             |                                                                                                                                     |                                 |                |                        |  |  |
|-----------------------------|-------------------------------------------------------------------------------------------------------------------------------------|---------------------------------|----------------|------------------------|--|--|
|                             | Tikmit 2010/Octo 2017                                                                                                               | Tally                           |                |                        |  |  |
|                             |                                                                                                                                     | Register                        |                |                        |  |  |
|                             |                                                                                                                                     | Report from the lower level     |                |                        |  |  |
|                             | Hidar 2010/Nov 2017                                                                                                                 | Tally                           |                |                        |  |  |
|                             |                                                                                                                                     | Register                        |                |                        |  |  |
|                             |                                                                                                                                     | Report from the lower level     |                |                        |  |  |
|                             | Tahisas 2010/ Dec 2017                                                                                                              | Tally                           |                |                        |  |  |
|                             |                                                                                                                                     | Register                        |                |                        |  |  |
|                             |                                                                                                                                     | Report from the lower level     |                |                        |  |  |
| SDS_3A                      | Review the dates on the data sources. Do all dates fall within the 2nd quarter of 2010E.C? (Yes=1, No=2 )                           |                                 |                |                        |  |  |
|                             | Tikmit 2010/October 2017                                                                                                            |                                 |                |                        |  |  |
|                             | Hidar 2010/Nov 2017                                                                                                                 |                                 |                |                        |  |  |
|                             | Tahisas 2010/ Dec 2017                                                                                                              |                                 |                |                        |  |  |
| SDS_4A                      | If the source document (service delivery register) is not available, what are the possible reasons?                                 |                                 |                |                        |  |  |
|                             | 1. Storage or archiving problems                                                                                                    |                                 |                |                        |  |  |
|                             | 2. Stock out of source document                                                                                                     |                                 |                |                        |  |  |
|                             | 3. Absence of designated staff                                                                                                      |                                 |                |                        |  |  |
|                             | 4. Other (specify)                                                                                                                  |                                 |                |                        |  |  |
| SDS_5A                      | If the source document (service delivery register) is not completely filled in, what are the possible reasons for the missing data? |                                 |                |                        |  |  |
|                             | 1. Staffing issue(s) (shortage, absence )                                                                                           |                                 |                |                        |  |  |
|                             | 2. Not understanding the data element                                                                                               |                                 |                |                        |  |  |
|                             | 3. Presence of other vertical reporting requirement                                                                                 |                                 |                |                        |  |  |
|                             | 4. Data burden (too much data elements to be recorded)                                                                              |                                 |                |                        |  |  |
|                             | 5. The recording tool is not designed as user friendly                                                                              |                                 |                |                        |  |  |
|                             | 6. other (specify):                                                                                                                 |                                 |                |                        |  |  |
| <b>B. REPORT TIMELINESS</b> |                                                                                                                                     |                                 |                |                        |  |  |
| SDS_1B                      | Does the health facility record the dates of submission of monthly HMIS reports to the Health center/Woreda (see logbook/computer)? | 1. Yes <input type="checkbox"/> | 0. No          |                        |  |  |
| SDS_2B                      | If 'Yes' for SDS_1`B, review the records and check the dates of submission for the three review months                              |                                 |                |                        |  |  |
|                             |                                                                                                                                     | Tikmit 2010/Octo                | Hidar 2010/Nov | Tahisas 2010/ Dec 2017 |  |  |

|                                                                                                                                           |                                                                                                                                     |                                                                   |                                                                   |                                                                   |      |
|-------------------------------------------------------------------------------------------------------------------------------------------|-------------------------------------------------------------------------------------------------------------------------------------|-------------------------------------------------------------------|-------------------------------------------------------------------|-------------------------------------------------------------------|------|
|                                                                                                                                           | Were the HMIS monthly reports submitted on time? ( <i>Current practices is submission from 21th to 26th of the month</i> )          | 1. Yes <input type="checkbox"/><br>0. No <input type="checkbox"/> | 1. Yes <input type="checkbox"/><br>0. No <input type="checkbox"/> | 1. Yes <input type="checkbox"/><br>0. No <input type="checkbox"/> |      |
| C- Recounting reported Results (accuracy)                                                                                                 |                                                                                                                                     |                                                                   |                                                                   |                                                                   |      |
| <i>Recount results from source documents, compare the verified numbers to the site reported numbers and explain discrepancies(if any)</i> |                                                                                                                                     | ANC 1                                                             | ANC4                                                              | SBA                                                               | EPNC |
| SDS_1C                                                                                                                                    | Recount the number of people, cases or events during the reporting period by reviewing the data source (register HC)/tally HP) (A). |                                                                   |                                                                   |                                                                   |      |
|                                                                                                                                           | Tikmit 2010/October 2017                                                                                                            |                                                                   |                                                                   |                                                                   |      |
|                                                                                                                                           | Hidar 2010/Nov 2017                                                                                                                 |                                                                   |                                                                   |                                                                   |      |
|                                                                                                                                           | Tahisas 2010/ Dec 2017                                                                                                              |                                                                   |                                                                   |                                                                   |      |
| SDS_2C                                                                                                                                    | Enter number of people, cases or events reported by the site during reporting period from site summary report(B)                    |                                                                   |                                                                   |                                                                   |      |
|                                                                                                                                           | Tikmit 2010/October 2017                                                                                                            |                                                                   |                                                                   |                                                                   |      |
|                                                                                                                                           | Hidar 2010/Nov 2017                                                                                                                 |                                                                   |                                                                   |                                                                   |      |
|                                                                                                                                           | Tahisas 2010/ Dec 2017                                                                                                              |                                                                   |                                                                   |                                                                   |      |
| SDS_4C                                                                                                                                    | Calculate the ratio of recounted to reported (A/B)                                                                                  |                                                                   |                                                                   |                                                                   |      |
|                                                                                                                                           | Tikmit 2010/October 2017                                                                                                            |                                                                   |                                                                   |                                                                   |      |
|                                                                                                                                           | Hidar 2010/Nov 2017                                                                                                                 |                                                                   |                                                                   |                                                                   |      |
|                                                                                                                                           | Tahisas 2010/ Dec 2017                                                                                                              |                                                                   |                                                                   |                                                                   |      |
| SDS_5C                                                                                                                                    | What are the reasons for discrepancy (if any) observed ((i.e. data entry errors, missing data sources, others)?                     |                                                                   |                                                                   |                                                                   |      |
|                                                                                                                                           | 1. Storage or archiving problems                                                                                                    |                                                                   |                                                                   |                                                                   |      |
|                                                                                                                                           | 2. Absence of designated staff                                                                                                      |                                                                   |                                                                   |                                                                   |      |
|                                                                                                                                           | 3. Stock out of source document                                                                                                     |                                                                   |                                                                   |                                                                   |      |
|                                                                                                                                           | 4. other(specify)                                                                                                                   |                                                                   |                                                                   |                                                                   |      |

| D. Systems Assessment                                                                                                                  |                                                                                                                                                                                                                                                                                      |  |
|----------------------------------------------------------------------------------------------------------------------------------------|--------------------------------------------------------------------------------------------------------------------------------------------------------------------------------------------------------------------------------------------------------------------------------------|--|
| <i>I - M&amp;E Structure, Functions and Capabilities (1.Yes completely 2. Partly 3. No 4.NA</i>                                        |                                                                                                                                                                                                                                                                                      |  |
| SDS_1D                                                                                                                                 | Is there a designated staff responsible for reviewing aggregated numbers prior to submission to the next level? (e.g. to health center or wereda)                                                                                                                                    |  |
| SDS_2D                                                                                                                                 | Have all relevant staff has received training on the data management processes and tools.                                                                                                                                                                                            |  |
| The M&E unit has provided written guidelines to each sub-reporting level on (Yes=1, No=2) NB: Ask and observe the available guidelines |                                                                                                                                                                                                                                                                                      |  |
| SDS-3D                                                                                                                                 | What they are supposed to report on?                                                                                                                                                                                                                                                 |  |
| SDS_4D                                                                                                                                 | How (e.g. in what specific format) reports are to be submitted?                                                                                                                                                                                                                      |  |
| SDS_5D                                                                                                                                 | To whom the reports should be submitted?                                                                                                                                                                                                                                             |  |
| SDS_6D                                                                                                                                 | When the reports are due?                                                                                                                                                                                                                                                            |  |
| <i>III - Data-collection and Reporting Forms and Tools (Yes=1, No=2)</i>                                                               |                                                                                                                                                                                                                                                                                      |  |
| SDS_7D                                                                                                                                 | Have there been clear instruction/orientation given to relevant staffs on how to complete the data collection and reporting forms/tools.                                                                                                                                             |  |
| SDS_8D                                                                                                                                 | Is the supply of standard reporting forms/tools consistent in the facility?                                                                                                                                                                                                          |  |
| SDS_9D                                                                                                                                 | Do the M&E Unit monitor on the consistent utilization of standard reporting forms/tools at all reporting levels.                                                                                                                                                                     |  |
| SDS_10D                                                                                                                                | The standard forms/tools are consistently used by the Service Delivery Site.                                                                                                                                                                                                         |  |
| SDS_11D                                                                                                                                | Are all <i>source documents</i> and <i>reporting forms</i> relevant for measuring the indicator (s) are available (hard copy print outs) for auditing purposes. (Including dated print-outs in case of computerized system)                                                          |  |
| <i>IV- Data Management Processes (Yes=1, No=2) This section is only for Health Centers</i>                                             |                                                                                                                                                                                                                                                                                      |  |
| SDS_12D                                                                                                                                | If applicable, there are quality controls in place for when data from paper-based forms are entered into a computer (e.g. double entry, post-data entry verification, etc).<br>(if not computerized skip to SDS_15D)                                                                 |  |
| SDS_13D                                                                                                                                | If applicable, there is a written back-up procedure for when data entry or data processing is computerized.                                                                                                                                                                          |  |
| SDS_14D                                                                                                                                | ....if 'yes' for SDS_12D the latest date of back-up is appropriate given the frequency of update of the computerized system (e.g., back-ups are weekly or monthly).                                                                                                                  |  |
| SDS_15D                                                                                                                                | The recording and reporting system avoids double counting people <i>within</i> and <i>across</i> Service Delivery Points (e.g., a person receiving the same service twice in a reporting period, a person registered as receiving the same service in two different locations, etc). |  |

| V - Links with National Reporting System (Yes=1, No=2) |                                                                                                                                                                         |  |
|--------------------------------------------------------|-------------------------------------------------------------------------------------------------------------------------------------------------------------------------|--|
| SDS_16D                                                | The relevant national forms/tools are used for data-collection and reporting.                                                                                           |  |
| SDS_17D                                                | Data are reported through a single channel of the national information systems.                                                                                         |  |
| VI – Use of Data for decision making (Yes=1, No=2)     |                                                                                                                                                                         |  |
| SDS_18D                                                | The service delivery site develops charts, graphs, maps, etc ...(If yes, ask to see them)                                                                               |  |
| SDS_19D                                                | Staff at the health facility has access to guideline/technical assistance on data use (e.g. peer review meetings or during supervisory visits)                          |  |
| SDS_20D                                                | The analyzed data/results are presented/ disseminated to stakeholders in a timely manner so that the information can be used for informed decisions. (observe examples) |  |
| SDS_21D                                                | There are programmatic decision taken by the facility based on the analyzed data (see/observe examples)                                                                 |  |

## 2. Woreda level assessment Questions

| Demographic data                                                                                                                                                         |                                                                                                                                                                       |                         |      |                       |           |
|--------------------------------------------------------------------------------------------------------------------------------------------------------------------------|-----------------------------------------------------------------------------------------------------------------------------------------------------------------------|-------------------------|------|-----------------------|-----------|
|                                                                                                                                                                          | Information                                                                                                                                                           | Response<br>Yes=1, No=2 |      | Remark                |           |
| 1                                                                                                                                                                        | Does the woreda health office have the catchment population the calendar year?                                                                                        |                         |      | If 'yes' how much ... |           |
| 2                                                                                                                                                                        | Does the woreda health office know the total number of eligible mothers for maternal service to be provided in the calendar year?                                     |                         |      |                       |           |
| 3                                                                                                                                                                        | Is the denominator value (for ANC, delivery and PNC) found in the woreda the same as the one found in the national level?<br>(If not the same explain the difference) |                         |      |                       |           |
| A. Recounting reported results (accuracy)                                                                                                                                |                                                                                                                                                                       |                         |      |                       |           |
| <i>Recount results from the periodic reports sent from service sites to the Woreda and compare to the value reported by the District. Explain discrepancies (if any)</i> |                                                                                                                                                                       | ANC1                    | ANC4 | SBA                   | Early PNC |
| WLA_1A                                                                                                                                                                   | Re-aggregate the numbers from the reports received from all Service Delivery Sites. What is the re-aggregated number? [A]                                             |                         |      |                       |           |
| WLA_1A_a                                                                                                                                                                 | Tikmit 2010 E.C / Oct. 2017                                                                                                                                           |                         |      |                       |           |

|          |                                                                                                                                                                       |  |  |  |  |
|----------|-----------------------------------------------------------------------------------------------------------------------------------------------------------------------|--|--|--|--|
| WLA_1A_b | Hidar 2010 E.C / Oct. 2017                                                                                                                                            |  |  |  |  |
| WLA_1A_c | Tahisas 2010 E.C / Oct. 2017                                                                                                                                          |  |  |  |  |
| WLA_2A   | What aggregated result was contained in the summary report prepared by the Woreda (and submitted to the next reporting level)? [B]                                    |  |  |  |  |
| WLA_2A_a | Tikmit 2010 E.C / Oct. 2017                                                                                                                                           |  |  |  |  |
| WLA_2A_b | Hidar 2010 E.C / Oct. 2017                                                                                                                                            |  |  |  |  |
| WLA_2A_c | Tahisas 2010 E.C / Oct. 2017                                                                                                                                          |  |  |  |  |
| WLA_3A   | Calculate the ratio of recounted to reported results. [A/B]                                                                                                           |  |  |  |  |
| WLA_3A_a | Tikmit 2010 E.C / Oct. 2017                                                                                                                                           |  |  |  |  |
| WLA_3A_b | Hidar 2010 E.C / Oct. 2017                                                                                                                                            |  |  |  |  |
| WLA_3A_c | Tahisas 2010 E.C / Oct. 2017                                                                                                                                          |  |  |  |  |
| WLA_4A   | What are the reasons for the discrepancy (if any) observed<br>1. data entry errors,<br>2. arithmetic errors,<br>3. missing data source,<br>4. (Other please specify)? |  |  |  |  |

## B. Report performance

| Report completeness |                                                                                                                        |  |
|---------------------|------------------------------------------------------------------------------------------------------------------------|--|
| WLA_5A              | How many facilities were expected to report [A]                                                                        |  |
|                     | Tikmit 2010 E.C / Oct. 2017                                                                                            |  |
|                     | Hidar 2010 E.C / Oct. 2017                                                                                             |  |
|                     | Tahisas 2010 E.C / Oct. 2017                                                                                           |  |
| WLA_6A              | How many facilities actually reported [B]                                                                              |  |
|                     | Tikmit 2010 E.C / Oct. 2017                                                                                            |  |
|                     | Hidar 2010 E.C / Oct. 2017                                                                                             |  |
|                     | Tahisas 2010 E.C / Oct. 2017                                                                                           |  |
| WLA_7A              | Calculate % Available Reports [B/A] sum                                                                                |  |
|                     | Tikmit 2010 E.C / Oct. 2017                                                                                            |  |
|                     | Hidar 2010 E.C / Oct. 2017                                                                                             |  |
|                     | Tahisas 2010 E.C / Oct. 2017                                                                                           |  |
| WLA_8A              | Check the dates on the reports received. How many reports were received on time? (i.e., received by the due date). [C] |  |

|                                                                                                 |                                                                                                                                                                                                                                                                                                                                                                                                                                                            |                                                                                           |                                                                                          |                                             |                         |
|-------------------------------------------------------------------------------------------------|------------------------------------------------------------------------------------------------------------------------------------------------------------------------------------------------------------------------------------------------------------------------------------------------------------------------------------------------------------------------------------------------------------------------------------------------------------|-------------------------------------------------------------------------------------------|------------------------------------------------------------------------------------------|---------------------------------------------|-------------------------|
| WLA_9A                                                                                          | Calculate % On time Reports [C/B]                                                                                                                                                                                                                                                                                                                                                                                                                          |                                                                                           |                                                                                          |                                             |                         |
| WLA_10A                                                                                         | How many reports were complete? (i.e., complete means that the report contained all the required indicator data, the date of reception of the report by the District, and the authentication by the responsible staff). [D]                                                                                                                                                                                                                                |                                                                                           |                                                                                          |                                             |                         |
| WLA_11A                                                                                         | Calculate % Complete Reports [D/B]                                                                                                                                                                                                                                                                                                                                                                                                                         |                                                                                           |                                                                                          |                                             |                         |
| WLA_12A                                                                                         | If any monthly HMIS reports were not complete, what are the possible reasons for the missing data? ( <i>Multiple responses is possible</i> ) 1. Staffing issue(s) (e.g. staff shortage, absence of designated staff, etc) 2. Not understanding the data element(s) 3. Presence of other vertical reporting requirements 4. Data burden (too much data elements to be recorded) 5. The design of the reporting form is not user friendly 6. Other (specify) |                                                                                           |                                                                                          |                                             |                         |
| Report timeliness                                                                               |                                                                                                                                                                                                                                                                                                                                                                                                                                                            |                                                                                           |                                                                                          |                                             |                         |
| WLA_13A                                                                                         | Does the Woreda office record receipt dates of monthly HMIS reports (observe logbook/electronic system)?                                                                                                                                                                                                                                                                                                                                                   | 1. Yes <input type="checkbox"/>                                                           | 0. No <input type="checkbox"/>                                                           | If No, skip to WLA_15A                      |                         |
| WLA_14A                                                                                         | If WLA_13A is 'yes', check the receipt dates for the three review months. How many reports were received on or before the 26th of the month                                                                                                                                                                                                                                                                                                                | Health facility type                                                                      | Tikimt 2010/Oct.2017                                                                     | Hidar 2010/Nov.2017                         | Tahisas 2010 / Dec.2017 |
|                                                                                                 |                                                                                                                                                                                                                                                                                                                                                                                                                                                            | Health centre                                                                             |                                                                                          |                                             |                         |
|                                                                                                 |                                                                                                                                                                                                                                                                                                                                                                                                                                                            | Health post                                                                               |                                                                                          |                                             |                         |
| WLA_15A                                                                                         | Does the Woreda office keep a record of its submission of monthly aggregated HMIS reports to Zonal or regional offices (e.g. emails, stamps, receipts, log book, etc.)?                                                                                                                                                                                                                                                                                    | 1. Yes <input type="checkbox"/>                                                           | 0. No <input type="checkbox"/>                                                           |                                             |                         |
| WLA_16A                                                                                         | If WLA_16A is yes, check the submission dates (date from---) of the aggregate HMIS reports for the three review months.                                                                                                                                                                                                                                                                                                                                    | Tikimt 2010/Oct 2017<br>1. Yes <input type="checkbox"/><br>0. No <input type="checkbox"/> | Hidar 2010/Nov.2017<br>1. Yes <input type="checkbox"/><br>0. No <input type="checkbox"/> | Tahisas 2010 / Dec.2017<br>1. Yes.<br>0. No |                         |
| Part 2. Systems Assessment (Woreda)                                                             |                                                                                                                                                                                                                                                                                                                                                                                                                                                            |                                                                                           |                                                                                          |                                             |                         |
| I - M&E Structure, Functions and Capabilities<br>(1. Yes completely 2. Yes partly 3. No 4. NA ) |                                                                                                                                                                                                                                                                                                                                                                                                                                                            |                                                                                           |                                                                                          |                                             |                         |
| SAW_1A                                                                                          | Are there designated staffs responsible for reviewing the quality of data (i.e., accuracy, completeness and timeliness) received from sub-reporting levels (e.g., service points)?                                                                                                                                                                                                                                                                         |                                                                                           |                                                                                          |                                             |                         |



|                                                                       |                                                                                                                                                                                                         |                                                                                                                                                                       |
|-----------------------------------------------------------------------|---------------------------------------------------------------------------------------------------------------------------------------------------------------------------------------------------------|-----------------------------------------------------------------------------------------------------------------------------------------------------------------------|
| SAW_2A                                                                | Are there designated staff responsible for reviewing aggregated numbers prior to submission to the next level (e.g., to the central M&E Unit).                                                          |                                                                                                                                                                       |
| SAW_3A                                                                | Does all relevant staff have received training on the data management processes and tools?                                                                                                              |                                                                                                                                                                       |
| <b>II DATA QUALITY ASSESSMENT MECHANISMS</b>                          |                                                                                                                                                                                                         |                                                                                                                                                                       |
| SAW_4                                                                 | Has the Woreda conducted data quality assessments at all health facilities in the review three months? (Please observe)                                                                                 | 0. No RDQA conducted<br>1. Yes, RDQA has been conducted in all health posts, Health centers, and hospitals<br>2. RDQA has been conducted, but only in some facilities |
| SAW_5                                                                 | Does the Woreda use data quality assessment tools (e.g., RDQA/data verification, in-built electronic data quality validation rules/system)? (Please observe)                                            | 0. No <input type="checkbox"/><br>1. Yes, observed <input type="checkbox"/><br>2. Yes, not observed                                                                   |
| SAW_6                                                                 | Does the Woreda maintain a record of health facility data quality assessments conducted in the past three months? (Please observe)                                                                      | 0. No <input type="checkbox"/><br>1. Yes, observed <input type="checkbox"/><br>2. Yes, not observed                                                                   |
| SAW_7                                                                 | Does the Woreda maintain records of feedback to health facilities on data quality assessment findings? (Please observe)                                                                                 | 0. No <input type="checkbox"/><br>1. Yes, observed <input type="checkbox"/><br>2. Yes, not observed                                                                   |
| <b>III- Indicator Definitions and Reporting Guidelines</b>            |                                                                                                                                                                                                         |                                                                                                                                                                       |
|                                                                       | The M&E Unit has provided written guidelines to each sub-reporting level on:-<br>(Yes=1, No=2)                                                                                                          |                                                                                                                                                                       |
| WID_1                                                                 | What they are supposed to report on.                                                                                                                                                                    |                                                                                                                                                                       |
| WID_2                                                                 | How (e.g., in what specific format) reports are to be submitted.                                                                                                                                        |                                                                                                                                                                       |
| WID_3                                                                 | To whom the reports should be submitted.                                                                                                                                                                |                                                                                                                                                                       |
| WID_4                                                                 | To When the reports are due.                                                                                                                                                                            |                                                                                                                                                                       |
| <b>IV - Data-collection and Reporting Forms / Tools (Yes=1, No=2)</b> |                                                                                                                                                                                                         |                                                                                                                                                                       |
| WDC_1                                                                 | Clear instructions have been provided by the M&E Unit on how to complete the data collection and reporting forms/tools.                                                                                 |                                                                                                                                                                       |
| WDC_2                                                                 | The M&E Unit has identified standard reporting forms/tools to be used by all reporting levels                                                                                                           |                                                                                                                                                                       |
| WDC_3                                                                 | The standard forms/tools are consistently used by the Service Delivery Site.                                                                                                                            |                                                                                                                                                                       |
| WDC_4                                                                 | All source documents and reporting forms relevant for measuring the indicator(s) are available (printed out backups) for auditing purposes (including dated print-outs in case of computerized system). |                                                                                                                                                                       |
| <b>V- Data Management Processes (Yes=1, No=2)</b>                     |                                                                                                                                                                                                         |                                                                                                                                                                       |

|                                                         |                                                                                                                                                                         |  |
|---------------------------------------------------------|-------------------------------------------------------------------------------------------------------------------------------------------------------------------------|--|
| WDM_1                                                   | Feedback is systematically provided to all service points on the quality of their reporting (i.e., accuracy, completeness and timeliness).                              |  |
| WDM_2                                                   | Are there quality controls in place for when data from paper-based forms are entered into a computer (e.g., double entry, post-data entry verification, etc)?           |  |
| WDM_3                                                   | Is there a written back-up procedure for when data entry or data processing is computerized?                                                                            |  |
| WDM_4                                                   | If WDM_3 'yes', the latest date of back-up is appropriate given the frequency of update of the computerized system (e.g., back-ups are weekly or monthly).              |  |
| WDM_5                                                   | There is a written procedure to address late, incomplete, inaccurate and missing reports; including following-up with health facility on data quality issues.           |  |
| VI - Links with National Reporting System (Yes=1, No=2) |                                                                                                                                                                         |  |
| WDM_6                                                   | The data are reported through a single channel of the national reporting system.                                                                                        |  |
| WDM_7                                                   | The relevant national forms/tools are used for data-collection and reporting.                                                                                           |  |
| VII – Use of Data for decision making (Yes=1, No=2)     |                                                                                                                                                                         |  |
| WDU_1D                                                  | The wereda develops charts, graphs, maps, etc ... <i>(If yes, ask to see them)</i>                                                                                      |  |
| WDU_2D                                                  | Staff at the wereda has access to guideline/technical assistance on data use (e.g. peer review meetings or during supervisory visits)                                   |  |
| WDU_3D                                                  | The analyzed data/results are presented/ disseminated to stakeholders in a timely manner so that the information can be used for informed decisions. (observe examples) |  |
| SDS_31D                                                 | There are programmatic decision taken by the wereda based on the analyzed data <i>(see/observe examples of document)</i>                                                |  |
