# Supplementary material for: Exploring data quality and use of the routine health information system in Ethiopia: a mixed-methods study
Source: PubMed Central journal article supplement (PMC8710857; doi:10.1136/bmjopen-2021-050356), 2021-12-23
Supplement: bmjopen-2021-050356supp004.pdf [file bmjopen-2021-050356supp004.pdf]

## Data quality assessment tool for nutrition indicators

Data quality assessment tools for *health center*

| <b>1. Health center Checklist</b>                                                                                                                     |                                                                           |       |
|-------------------------------------------------------------------------------------------------------------------------------------------------------|---------------------------------------------------------------------------|-------|
| <b>Person Interviewed ( title)</b>                                                                                                                    |                                                                           |       |
| <b>Health center Name</b>                                                                                                                             |                                                                           |       |
| <i>(Interviewer: Please verify if the following equipment is available in the Health center)</i>                                                      |                                                                           |       |
| <b>1. Equipment</b>                                                                                                                                   |                                                                           |       |
| 1.1. Computer (give a number)                                                                                                                         | 1. yes                                                                    | 0. no |
| 1.2. Data Back-up Unit (e.g. CD, flash disc)                                                                                                          | 1. yes                                                                    | 0. no |
| 1.3. Printers                                                                                                                                         | 1. yes                                                                    | 0. no |
| 1.4. UPS                                                                                                                                              | 1. yes                                                                    | 0. no |
| 1.5. Generators                                                                                                                                       | 1. yes                                                                    | 0. no |
| 1.6. Regular telephone                                                                                                                                | 1. yes                                                                    | 0. no |
| 1.7. Access to the internet                                                                                                                           | 1. yes                                                                    | 0. no |
| 1.8. Calculator                                                                                                                                       | 1. yes                                                                    | 0. no |
| <b>2. Utilities</b>                                                                                                                                   |                                                                           |       |
| 2.1. Is there an electricity supply?                                                                                                                  | 1. yes                                                                    | 0. no |
| 2.2. How often is the electricity supply interrupted?                                                                                                 | 0. Never/occasionally 1. Once a month 2. Twice a month 3. Weekly 4. Daily |       |
| 2.3. Is the room, where the computer hardware is kept, air-conditioned?                                                                               | 1. yes                                                                    | 0. no |
| <b>3. Availability of registers, forms</b>                                                                                                            |                                                                           |       |
| <i>Type of record, report or register</i>                                                                                                             | Have you run out of this form in the past 6 month? If so, why?            |       |
| 3.1 <i>Integrated Management of Neonatal and Childhood Illnesses (IMNCI) register</i>                                                                 | 1. yes<br><b>Reasons:</b>                                                 | 0. no |
| 3.2 <i>Comprehensive and Integrated Nutrition Service for &lt;5 years children tally sheet</i>                                                        | 1. yes<br><b>Reasons:</b>                                                 | 0. no |
| 3.3 <i>Outpatient Therapeutic Program (OTP) card</i>                                                                                                  | 1. yes<br><b>Reasons:</b>                                                 | 0. no |
| 3.4 <i>Stabilization Centre (SC) register</i>                                                                                                         | 1. yes<br><b>Reasons:</b>                                                 | 0. no |
| 3.5 <i>Stabilization Centre (SC) tally sheet</i>                                                                                                      | 1. yes<br><b>Reasons:</b>                                                 | 0. no |
| <b>4. Trained staff</b>                                                                                                                               |                                                                           |       |
| Are there staff members who received any training in the recording, processing, or reporting of health information during the last two years? If yes; |                                                                           |       |
| <b>4.1. HMIS</b>                                                                                                                                      |                                                                           |       |
| 4.1.1. Health officer                                                                                                                                 | 1. yes                                                                    | 0. no |
| 4.1.2. Nurse                                                                                                                                          | 1. yes                                                                    | 0. no |
| 4.1.3. Health information technician (HIT)                                                                                                            | 1. yes                                                                    | 0. no |
| 4.1.4. Other (specify)                                                                                                                                |                                                                           |       |
| <b>4.2. CHIS</b>                                                                                                                                      |                                                                           |       |
| 4.2.1. Health officer                                                                                                                                 | 1. yes                                                                    | 0. no |
| 4.2.2. Nurse                                                                                                                                          | 1. yes                                                                    | 0. no |
| 4.2.3. Health information technician (HIT)                                                                                                            | 1. yes                                                                    | 0. no |
| 4.2.4. Other (specify)                                                                                                                                |                                                                           |       |
| <b>4.3. DHIS2</b>                                                                                                                                     |                                                                           |       |

|                                            |        |       |
|--------------------------------------------|--------|-------|
| 4.3.1. Health officer                      | 1. yes | 0. no |
| 4.3.2. Nurse                               | 1. yes | 0. no |
| 4.3.3. Health information technician (HIT) | 1. yes | 0. no |
| 4.3.4. Other (specify)                     |        |       |

**Technical factors- Health center**

|      |                                                                                          |                           |
|------|------------------------------------------------------------------------------------------|---------------------------|
| 18   | Does a tally sheet exist?                                                                | 1. Yes, Observed<br>0. No |
| 19   | Do data processing procedures exist?                                                     | 1. Yes, Observed<br>0. No |
| 20   | Does the facility produce the following?                                                 |                           |
| 20.1 | Calculate nutrition indicators of the facility                                           | 1. Yes, Observed<br>0. No |
| 20.2 | Comparisons with Woreda targets                                                          | 1. Yes, Observed<br>0. No |
| 20.3 | Comparisons with National targets                                                        | 1. Yes, Observed<br>0. No |
| 20.4 | Comparisons among types of nutrition services coverage                                   | 1. Yes, Observed<br>0. No |
| 20.5 | Comparisons of nutrition services data over time (monitoring over time)                  | 1. Yes, Observed<br>0. No |
| 21   | Does a procedure manual for nutrition services data collection (with definitions) exist? | 1. Yes, Observed<br>0. No |

**Data Completeness- at Health center level for the last six months**

| 22       | What is the number of Health posts in the catchment area that are supposed to report nutrition indicators? |                                                                                                                                                                                                                       |          |         |          |         |         |          |  |  |  |  |  |  |
|----------|------------------------------------------------------------------------------------------------------------|-----------------------------------------------------------------------------------------------------------------------------------------------------------------------------------------------------------------------|----------|---------|----------|---------|---------|----------|--|--|--|--|--|--|
| 23       | What is the number of Health posts in the catchment area that are actually reporting nutrition indicators? |                                                                                                                                                                                                                       |          |         |          |         |         |          |  |  |  |  |  |  |
| 24       | How many nutrition data indicator is the health center supposed to receive on the HMIS monthly report?     |                                                                                                                                                                                                                       |          |         |          |         |         |          |  |  |  |  |  |  |
| 25       | How many nutrition data indicator is the health center receive on the HMIS monthly report?                 |                                                                                                                                                                                                                       |          |         |          |         |         |          |  |  |  |  |  |  |
| 26       | How many nutrition indicators does the health center need to report on in the HMIS monthly report?         |                                                                                                                                                                                                                       |          |         |          |         |         |          |  |  |  |  |  |  |
| 27       | Does the health center keep copies of HMIS monthly reports sent by health posts?                           | 1. Yes<br>0. No                                                                                                                                                                                                       |          |         |          |         |         |          |  |  |  |  |  |  |
| 28       | Does the health center keep copies of HMIS monthly reports sent to the woreda health office?               | 1. Yes<br>0. No                                                                                                                                                                                                       |          |         |          |         |         |          |  |  |  |  |  |  |
| 29       | Count the number of monthly reports submitted by the health posts for the last 6 months                    | <table border="1"> <tr> <th>Mont h 1</th> <th>Month 2</th> <th>Month 3</th> <th>Month 4</th> <th>Month 5</th> <th>Mont h 6</th> </tr> <tr> <td></td> <td></td> <td></td> <td></td> <td></td> <td></td> </tr> </table> | Mont h 1 | Month 2 | Month 3  | Month 4 | Month 5 | Mont h 6 |  |  |  |  |  |  |
| Mont h 1 | Month 2                                                                                                    | Month 3                                                                                                                                                                                                               | Month 4  | Month 5 | Mont h 6 |         |         |          |  |  |  |  |  |  |
|          |                                                                                                            |                                                                                                                                                                                                                       |          |         |          |         |         |          |  |  |  |  |  |  |
| 30       |                                                                                                            | <table border="1"> <tr> <th>Mont h 1</th> <th>Month 2</th> <th>Month 3</th> <th>Month 4</th> <th>Month 5</th> <th>Mont h 6</th> </tr> <tr> <td></td> <td></td> <td></td> <td></td> <td></td> <td></td> </tr> </table> | Mont h 1 | Month 2 | Month 3  | Month 4 | Month 5 | Mont h 6 |  |  |  |  |  |  |
| Mont h 1 | Month 2                                                                                                    | Month 3                                                                                                                                                                                                               | Month 4  | Month 5 | Mont h 6 |         |         |          |  |  |  |  |  |  |
|          |                                                                                                            |                                                                                                                                                                                                                       |          |         |          |         |         |          |  |  |  |  |  |  |

|    |                                                                                                                                                                 |                          |  |  |  |  |  |
|----|-----------------------------------------------------------------------------------------------------------------------------------------------------------------|--------------------------|--|--|--|--|--|
|    | Count the number of monthly reports submitted to the woreda health office by the health center for the last 6 months                                            |                          |  |  |  |  |  |
| 31 | Does the health center fill the monthly report form completely                                                                                                  | 1.Yes, Observed<br>0. No |  |  |  |  |  |
| 32 | Count the number of nutrition indicators that are supposed to be filled in by this facility but left blank without indicating "0" for the last 6 months reports |                          |  |  |  |  |  |

| <b>Data timeliness- at Health center level for the last six months</b> |                                                                                  |                                        |               |      |      |      |      |
|------------------------------------------------------------------------|----------------------------------------------------------------------------------|----------------------------------------|---------------|------|------|------|------|
| 33                                                                     | When are you expecting to receive the HMIS report from health posts?             |                                        |               |      |      |      |      |
| 34                                                                     | Does the health center record receipt dates of the HMIS monthly report?          |                                        | 1.Yes         | 0.No |      |      |      |
|                                                                        | If yes, check the dates of receipts for the last six months                      |                                        |               |      |      |      |      |
|                                                                        |                                                                                  |                                        | HP 1          | HP 2 | HP 3 | HP 4 | HP 5 |
| 34.1                                                                   | Month (specify)                                                                  | 1.Before deadline<br>0. After deadline |               |      |      |      |      |
| 34.2                                                                   | Month (specify)                                                                  | 1.Before deadline<br>0. After deadline |               |      |      |      |      |
| 34.3                                                                   | Month (specify)                                                                  | 1.Before deadline<br>0. After deadline |               |      |      |      |      |
| 34.4                                                                   | Month (specify)                                                                  | 1.Before deadline<br>0. After deadline |               |      |      |      |      |
| 34.5                                                                   | Month (specify)                                                                  | 1.Before deadline<br>0. After deadline |               |      |      |      |      |
| 34.6                                                                   | Month (specify)                                                                  | 1.Before deadline<br>0. After deadline |               |      |      |      |      |
| 35                                                                     | When are you expected to submit HMIS report to woreda health office?             |                                        |               |      |      |      |      |
| 36                                                                     | Does the health center have a record of submitting data on time to woreda level? |                                        | 1.Yes<br>0.No |      |      |      |      |
|                                                                        | If yes, check the dates of submission for the last six months                    |                                        |               |      |      |      |      |
| 36.1                                                                   | Month (specify)                                                                  | 1.Before deadline<br>0. After deadline |               |      |      |      |      |
| 36.2                                                                   | Month (specify)                                                                  | 1.Before deadline<br>0. After deadline |               |      |      |      |      |
| 36.3                                                                   | Month (specify)                                                                  | 1.Before deadline<br>0. After deadline |               |      |      |      |      |
| 36.4                                                                   | Month (specify)                                                                  | 1.Before deadline<br>0. After deadline |               |      |      |      |      |
| 36.5                                                                   | Month (specify)                                                                  | 1.Before deadline<br>0. After deadline |               |      |      |      |      |
| 36.6                                                                   | Month (specify)                                                                  | 1.Before deadline<br>0. After deadline |               |      |      |      |      |

| <b>Data Accuracy Check- health center level for the last six months</b> |                                                                                                                                                                                  |                                          |                                                  |                                          |                                                    |                                          |                                                            |                                          |  |
|-------------------------------------------------------------------------|----------------------------------------------------------------------------------------------------------------------------------------------------------------------------------|------------------------------------------|--------------------------------------------------|------------------------------------------|----------------------------------------------------|------------------------------------------|------------------------------------------------------------|------------------------------------------|--|
| <b>Cluster report from all the health posts</b>                         |                                                                                                                                                                                  |                                          |                                                  |                                          |                                                    |                                          |                                                            |                                          |  |
| 37                                                                      | Manually count the number of following data items from the HMIS monthly reports for the last 6 months. Compare the figures with the reports from the computer or paper database. |                                          |                                                  |                                          |                                                    |                                          |                                                            |                                          |  |
|                                                                         |                                                                                                                                                                                  | Indicator                                |                                                  |                                          |                                                    |                                          |                                                            |                                          |  |
|                                                                         | Denominator                                                                                                                                                                      |                                          |                                                  |                                          |                                                    |                                          |                                                            |                                          |  |
|                                                                         | Month (specify)                                                                                                                                                                  | Number of <5 children received VAS       | Number of <5 children With SAM                   |                                          | Total number of children received GMP (< 2 years ) |                                          | Number of children with two doses of Deworming (2-5 years) |                                          |  |
|                                                                         | HMIS report received from health post aggregated                                                                                                                                 | HMIS report send to woreda health office | HMIS report received from health post aggregated | HMIS report send to woreda health office | HMIS report received from health post aggregated   | HMIS report send to woreda health office | HMIS report received from health post aggregated           | HMIS report send to woreda health office |  |
| 37.1                                                                    |                                                                                                                                                                                  |                                          |                                                  |                                          |                                                    |                                          |                                                            |                                          |  |
| 37.2                                                                    |                                                                                                                                                                                  |                                          |                                                  |                                          |                                                    |                                          |                                                            |                                          |  |
| 37.3                                                                    |                                                                                                                                                                                  |                                          |                                                  |                                          |                                                    |                                          |                                                            |                                          |  |
| 37.4                                                                    |                                                                                                                                                                                  |                                          |                                                  |                                          |                                                    |                                          |                                                            |                                          |  |
| 37.5                                                                    |                                                                                                                                                                                  |                                          |                                                  |                                          |                                                    |                                          |                                                            |                                          |  |
| 37.6                                                                    |                                                                                                                                                                                  |                                          |                                                  |                                          |                                                    |                                          |                                                            |                                          |  |

| <b>Data Accuracy Check- health center level for the last six months Name of health post .....</b> |                                                                                                                                                                                  |                                          |                                       |                                          |                                                    |                                          |                                                            |                                          |  |
|---------------------------------------------------------------------------------------------------|----------------------------------------------------------------------------------------------------------------------------------------------------------------------------------|------------------------------------------|---------------------------------------|------------------------------------------|----------------------------------------------------|------------------------------------------|------------------------------------------------------------|------------------------------------------|--|
| 38                                                                                                | Manually count the number of following data items from the HMIS monthly reports for the last 6 months. Compare the figures with the reports from the computer or paper database. |                                          |                                       |                                          |                                                    |                                          |                                                            |                                          |  |
|                                                                                                   |                                                                                                                                                                                  | Indicator                                |                                       |                                          |                                                    |                                          |                                                            |                                          |  |
|                                                                                                   | Denominator                                                                                                                                                                      |                                          |                                       |                                          |                                                    |                                          |                                                            |                                          |  |
|                                                                                                   | Month (specify)                                                                                                                                                                  | Number of <5 children received VAS       | Number of <5 children With SAM        |                                          | Total number of children received GMP (< 2 years ) |                                          | Number of children with two doses of Deworming (2-5 years) |                                          |  |
|                                                                                                   | HMIS report received from health post                                                                                                                                            | HMIS report send to woreda health office | HMIS report received from health post | HMIS report send to woreda health office | HMIS report received from health post              | HMIS report send to woreda health office | HMIS report received from health post                      | HMIS report send to woreda health office |  |
| 38.1                                                                                              |                                                                                                                                                                                  |                                          |                                       |                                          |                                                    |                                          |                                                            |                                          |  |
| 38.2                                                                                              |                                                                                                                                                                                  |                                          |                                       |                                          |                                                    |                                          |                                                            |                                          |  |

|      |  |  |  |  |  |  |  |  |  |
|------|--|--|--|--|--|--|--|--|--|
| 38.3 |  |  |  |  |  |  |  |  |  |
| 38.4 |  |  |  |  |  |  |  |  |  |
| 38.5 |  |  |  |  |  |  |  |  |  |
| 38.6 |  |  |  |  |  |  |  |  |  |
