# Supplementary material for: Exploring data quality and use of the routine health information system in Ethiopia: a mixed-methods study
Source: PubMed Central journal article supplement (PMC8710857; doi:10.1136/bmjopen-2021-050356), 2021-12-23
Supplement: bmjopen-2021-050356supp005.pdf [file bmjopen-2021-050356supp005.pdf]

Table 1 Coding framework

| PRISM themes                   | Themes from ORCA                                                                                                                                               | Codes                                                                                                                                                                                                                                                                                   |
|--------------------------------|----------------------------------------------------------------------------------------------------------------------------------------------------------------|-----------------------------------------------------------------------------------------------------------------------------------------------------------------------------------------------------------------------------------------------------------------------------------------|
| <b>Technical factors</b>       | Denominator                                                                                                                                                    | <ul style="list-style-type: none"> <li>• Wrong denominator</li> <li>• Outdated denominator</li> </ul>                                                                                                                                                                                   |
|                                | Complexity of forms and procedures for data recording and reporting                                                                                            | <ul style="list-style-type: none"> <li>• Lack of guideline for recording</li> <li>• Complexity of Indicator definitions</li> <li>• Multiple forms</li> <li>• Parallel reporting</li> </ul>                                                                                              |
|                                | Language issues;                                                                                                                                               | <ul style="list-style-type: none"> <li>• Language barrier</li> </ul>                                                                                                                                                                                                                    |
| <b>Behavioral Factors</b>      | Knowledge and skills to manage HMIS                                                                                                                            | <ul style="list-style-type: none"> <li>• understanding of health data</li> <li>• Experience on data collection and reporting</li> <li>• Lack of program knowledge</li> <li>• Poor capacity on recording</li> <li>• Low training</li> <li>• Lack of skill operating computers</li> </ul> |
|                                | Indicator definitions                                                                                                                                          | <ul style="list-style-type: none"> <li>• Knowledge on Health data and indicator definition</li> </ul>                                                                                                                                                                                   |
|                                | motivation                                                                                                                                                     | <ul style="list-style-type: none"> <li>• motivation</li> </ul>                                                                                                                                                                                                                          |
|                                | Perception towards data quality and the level of emphasis given                                                                                                | <ul style="list-style-type: none"> <li>• Perception towards data quality and the level of emphasis given</li> </ul>                                                                                                                                                                     |
|                                | Available interventions to improve Data quality and use,                                                                                                       | <ul style="list-style-type: none"> <li>• Available interventions to improve Data quality and use,</li> </ul>                                                                                                                                                                            |
|                                | Data use                                                                                                                                                       | <ul style="list-style-type: none"> <li>• Data use</li> </ul>                                                                                                                                                                                                                            |
|                                | <b>Organizational Factors</b>                                                                                                                                  | Communication between levels;                                                                                                                                                                                                                                                           |
| Monitoring,                    | <ul style="list-style-type: none"> <li>• Routine data quality assessment</li> <li>• Performance monitoring team</li> </ul>                                     |                                                                                                                                                                                                                                                                                         |
| supervision and evaluation     | <ul style="list-style-type: none"> <li>• feedback and learning</li> <li>• HMIS data quality assurance methods</li> <li>• Report evaluation practice</li> </ul> |                                                                                                                                                                                                                                                                                         |
| Accountability                 | <ul style="list-style-type: none"> <li>• Incentive mechanism</li> </ul>                                                                                        |                                                                                                                                                                                                                                                                                         |
| Training: inadequate training, | <ul style="list-style-type: none"> <li>• Capacity buildings</li> <li>• Trained man power</li> <li>• training for a wrong person</li> </ul>                     |                                                                                                                                                                                                                                                                                         |
| Staff turnover,                | <ul style="list-style-type: none"> <li>• staff Turnover</li> </ul>                                                                                             |                                                                                                                                                                                                                                                                                         |
| Staff retention                | <ul style="list-style-type: none"> <li>• attrition</li> <li>• Staff rotation</li> <li>• lack of HR resource</li> </ul>                                         |                                                                                                                                                                                                                                                                                         |
| Workload                       | <ul style="list-style-type: none"> <li>• Workload</li> </ul>                                                                                                   |                                                                                                                                                                                                                                                                                         |

|                                  |                                                                |                                                                                                                                                                   |
|----------------------------------|----------------------------------------------------------------|-------------------------------------------------------------------------------------------------------------------------------------------------------------------|
| <b>Availability of resources</b> | Supply and availability of equipment for HMIS activity         | <ul style="list-style-type: none"> <li>• Shortage of HMIS tools</li> </ul>                                                                                        |
|                                  | Availability of source documents;                              | <ul style="list-style-type: none"> <li>• HMIS budget, logistics and infrastructure</li> <li>• transportation logistics</li> </ul>                                 |
|                                  | Availability of computers and electricity                      | <ul style="list-style-type: none"> <li>• availability of printing materials</li> <li>• availability of computer</li> <li>• availability of electricity</li> </ul> |
|                                  | Human resource for HMIS (shortage in number),                  | <ul style="list-style-type: none"> <li>• Shortage of human resource for HMIS</li> </ul>                                                                           |
|                                  | finance                                                        | <ul style="list-style-type: none"> <li>• Finance</li> </ul>                                                                                                       |
| <b>RHIS Processes</b>            | Data flow                                                      | <ul style="list-style-type: none"> <li>• Data flow/Difference</li> </ul>                                                                                          |
|                                  | Data recording and reporting practice                          | <ul style="list-style-type: none"> <li>• Wrong reporting/over reporting/under reporting</li> </ul>                                                                |
|                                  | Triangulation of data within routine health information system | <ul style="list-style-type: none"> <li>• Different Reporting period</li> <li>• Separate Logistics and TB Service reporting</li> </ul>                             |
|                                  | Completeness,                                                  | <ul style="list-style-type: none"> <li>• double reporting during referral</li> </ul>                                                                              |
|                                  | timeliness,                                                    | <ul style="list-style-type: none"> <li>• Delay in reporting</li> </ul>                                                                                            |
|                                  | accuracy of reporting                                          | <ul style="list-style-type: none"> <li>• Source of data</li> <li>• Reporting format difference (HC and HP)</li> <li>• Under report for private sector</li> </ul>  |
